# Supplementary material for: Efficient transcription through an intron requires the binding of an Sm-type U1 snRNP with intact stem loop II to the splice donor
Source: PubMed Central journal article supplement — Nucleic Acids Res. 2010 Jan 13;38(9):3041–53. doi: 10.1093/nar/gkp1224 (PMC2875018; doi:10.1093/nar/gkp1224), 2010-01-13
Supplement: gkp1224_1.pdf [file gkp1224_1.pdf]

# Supplemental Experimental Procedures

**Table S1. Sequence of oligonucleotide primers used in this study**

| <b>Name</b> | <b>5' to 3' sequence</b>                                                                           |
|-------------|----------------------------------------------------------------------------------------------------|
| Odp.124     | cttctctatcaaagcatgcagtagtacatgta                                                                   |
| Odp.1619    | gctgtcttaagatcgtgaatcggttcgccaaggatatagtccattaagctttcaaaccacctcccaatcccaggaggacccgacaggccccgaaggaa |
| Odp.1124    | gggtcaaataaacactgaaggaagtg                                                                         |
| Odp.1854    | cccttgctcaccgtgctagctttatataccacagccaattg                                                          |
| Odp.1855    | caaattggctgtggtatataaaagctagcacggtagcaaggg                                                         |
| Odp.1856    | ccaagcctcctactatcatttagctagagtcgcgccgct                                                            |
| Odp.1857    | agcggcccgactctagctaaatgatagtaggaggcttg                                                             |
| Odp.1665    | atgctgctgtgctggctagaagcacaag                                                                       |
| Odp.1006    | gcagagagaaaccggtgcagtgggaataggagctttg                                                              |
| Odp.1459    | cccgaagatctcactagcactggcaggggagatacca                                                              |
| Odp.1452    | cccaaatgtgggaaactcgactgcatagtggtagtgggggactgctgctcgcg                                              |
| Odp.241     | gtcgtaaacaactccgccccattg                                                                           |
| Odp.1548    | aggttgcattacatgtactactacctcgccctcgccggacacgctgaac                                                  |
| Odp.1550    | gttcagcgtgtccggcgagggcgaggttaagtagtacatgtaatgcaacct                                                |
| Odp.1551    | tcagctgccgtaggtggcatgccctgaaacgataatggtgaatatccc                                                   |
| Odp.1549    | gggatattcaccattatcgttcaggggcgatgccacctacggcaagctga                                                 |
| Odp.1745    | attataggtgcattacatgtactactgcactcgccctcgccggacacgctgaactgtg                                         |
| Odp.1746    | cacaagttcagcgtgtccggcgagggcgagtgtagtagtacatgtaatgcaacctataat                                       |
| Odp.1747    | tcagctgccgtaggtggcatgccctgaaagcttaatggactatatcct                                                   |
| Odp.1748    | aggatatagtccattaagctttcaaggcgatgccacctacggcaagctga                                                 |
| Odp.773     | gtgggagcagtagtctcgag                                                                               |
| Odp.817     | gattccccgtgccaagagtg                                                                               |
| Odp.70      | actattgtattattattgctactac                                                                          |
| Odp.1409    | acctagaaaaacatggagcaatca                                                                           |
| Odp.1410    | cccccttttcttttaaaagtgg                                                                             |
| Odp.2       | ctctgtaactagatccctcag                                                                              |
| Odp.40      | ttgctactgtgattgctccatg                                                                             |
| Odp.445     | cctgagcaccagtcgcccctgag                                                                            |
| Odp.1250    | gcgccgcttactgtacagctcgtccatg                                                                       |
| Odp.9998    | ggggagataaccattgacacgaatgtggtttccaggggcg                                                           |
| Odp.9999    | tcccagggcgaggctatcccctacgctccggatgtgctg                                                            |
| Odp.1919    | ggtggtttccaggcgatttcccaaatg                                                                        |
| Odp.1006    | gcagagagaaaccggtgcagtgggaataggagctttg                                                              |
| Odp.1126    | cagtgacaaaattagatgttcac                                                                            |
| Odp.92      | ctggtgcaactcacagctgg                                                                               |
| Odp.267     | gacccgacaggcctgaaggaatagaag                                                                        |

**Table S2. Mutagenic forward primers and their corresponding mutation**

| <b>Primer</b> | <b>Mutagenesis site</b> |
|---------------|-------------------------|
| Odp.124       | mutSD4                  |
| Odp.1619      | mutSA7                  |
| Odp.267       | R38                     |
| Odp.1459      | U1 mut5'arm             |
| Odp.1452      | Sm                      |
| Odp.9998      | U170k                   |
| Odp.9999      | U1A                     |
| Odp.1919      | $\Delta$ SII            |
| Odp.1006      | gp140unc                |
