# Supplementary material for: Efficient transcription through an intron requires the binding of an Sm-type U1 snRNP with intact stem loop II to the splice donor
Source: PubMed Central journal article supplement — Nucleic Acids Res. 2010 Jan 13;38(9):3041–53. doi: 10.1093/nar/gkp1224 (PMC2875018; doi:10.1093/nar/gkp1224), 2010-01-13
Supplement: gkp1224_2.pdf [file gkp1224_2.pdf]

## Supplemental Experimental Procedures

**Table S3. Real-time RT-qPCR primers**

| Target gene | Forward (5'-3')      | Reverse (5'-3')            |
|-------------|----------------------|----------------------------|
| GAPDH       | catggcctccaaggagtaag | ctgaatctcccctcctcaca       |
| HPRT1       | gaccagtcaacaggggacat | cctgaccaaggaaagcaaag       |
| YWHAZ       | agcaggctgagcgatgat   | tctcagcaccttccgtcttt       |
| ENV         | caagagtgacgtccaactgc | gtagtagcaataataatagcaatagt |
| U1 mut5'arm | atactgcactggcagggga  | atgcagtcgagttccaca         |
