# Supplementary material for: Efficient transcription through an intron requires the binding of an Sm-type U1 snRNP with intact stem loop II to the splice donor
Source: PubMed Central journal article supplement — Nucleic Acids Res. 2010 Jan 13;38(9):3041–53. doi: 10.1093/nar/gkp1224 (PMC2875018; doi:10.1093/nar/gkp1224), 2010-01-13
Supplement: gkp1224_4.pdf [file gkp1224_4.pdf]

## Supplemental Results

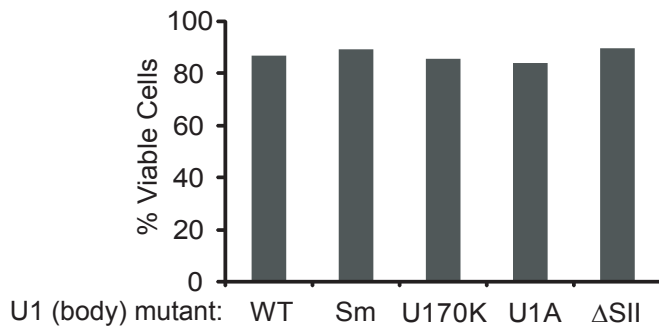

**Figure S3. Transfection of U1snRNA mutants does not reduce cell viability.** Cells from a 6-well plate were transfected with 1.5 $\mu$ g of either wild-type U1 snRNA or the four mutants as indicated, harvested 36 hours post transfection, resuspended in 1 x phosphate buffered saline to which 5 $\mu$ l of 7-AAD Viability Staining Solution was added. Fluorescence in the red channel was measured by FACS. Values represent 100 less % of cells above Mock (un-transfected cells) fluorescence.

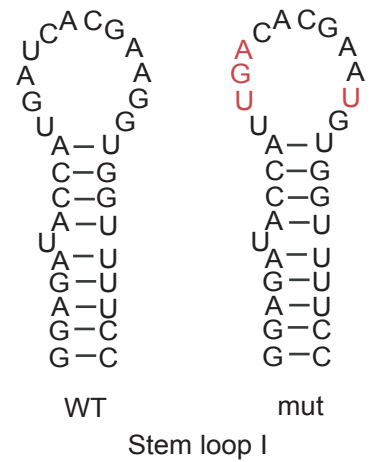

**Figure S4.** Secondary RNA structure of U1 snRNA stem loop I. The stem loop sequence of WT and mut was submitted to M-fold RNA software to obtain the structure shown.

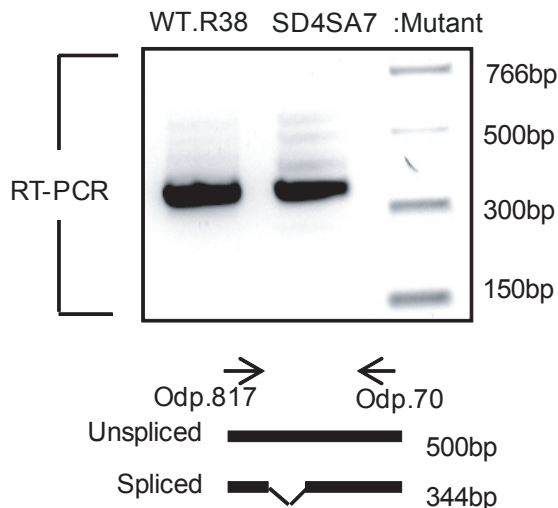

**Figure S5.** The heterologous hybrid intron is constitutively spliced. cDNA from the transfection in Figure 4B was amplified using the primers indicated with amplification of a 344bp product being indicative of constitutive splicing.

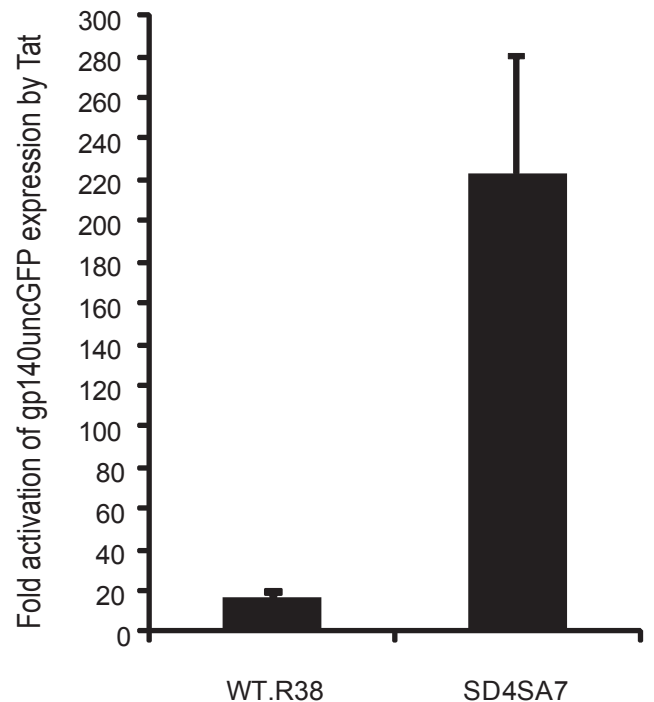

**Figure S6. Tat enhances expression of the SD4SA7 mutant more than WT.R38.** Cells were transfected with 2 $\mu$ g pHIV-gp140uncGFP containing either WT.R38 or SD4SA7 mutations and either 100ng of pCMV-Tat(2stop) (-Tat) or pCMV-Tat (+Tat) with 100ng pCMV-Rev. Fold activation is expressed here as +Tat/-Tat. Transfections were performed on three separate days and the average shown, error bars represent the standard deviation of the mean.
